# Supplementary material for: Medical Abortion Provision by Pharmacies and Drug Sellers in Low‐ and Middle‐Income Countries: A Systematic Review
Source: PubMed Central journal article supplement — Stud Fam Plann. 2018 Mar 6;49(1):57–70. doi: 10.1111/sifp.12049 (PMC5947709; doi:10.1111/sifp.12049), 2018-03-06
Supplement: SIFP-49-57-s001.pdf [file SIFP-49-57-s001.pdf]

**Table 1 List of search terms used**

| Search term sets                                      | Terms                                                                                                                                                                                                                                                                                                                                                                                                                                                                                                                                                                                                                                                                                                                                                                                                                                                                                                                     |
|-------------------------------------------------------|---------------------------------------------------------------------------------------------------------------------------------------------------------------------------------------------------------------------------------------------------------------------------------------------------------------------------------------------------------------------------------------------------------------------------------------------------------------------------------------------------------------------------------------------------------------------------------------------------------------------------------------------------------------------------------------------------------------------------------------------------------------------------------------------------------------------------------------------------------------------------------------------------------------------------|
| 1 Abortion                                            | <i>Abortion OR induced abortion OR pregnancy termination OR termination of pregnancy OR medical abortion OR abortifacient OR mifepristone-misoprostol OR misoprostol OR mifepristone OR methotrexate OR gemeprost OR dinoprost OR meteneprost OR onapristone OR epostane OR cytotec OR oxytocin OR mifegyne OR "Abortion, Induced"[Mesh](Pubmed and Embase only)</i>                                                                                                                                                                                                                                                                                                                                                                                                                                                                                                                                                      |
| 2 Pharmacy/<br>Pharmacy<br>worker/Self-<br>medication | <i>pharmacy OR pharmacist OR chemist OR dispensary OR medicine shop OR drug shop OR drug seller OR medicine seller OR drug vendor OR medicine vendor OR drug store OR medicine store OR apothecary OR druggist OR drug retailer OR medicine retailer OR retail market OR over the counter OR over-the-counter OR self-administ* OR self administ* OR self-medicat* OR self medicat* OR home use OR home-use OR home-medicat* OR home medicat* OR home-administ* OR home administ* OR home-based OR home based OR self-use OR self use OR self-induced OR self induced OR home manag*<br/>OR "Pharmacies"[Mesh] OR "Pharmacists"[Mesh] OR "Pharmacists' Aides"[Mesh] (Pubmed/Embase databases only)</i>                                                                                                                                                                                                                    |
| 3 Intervention                                        | <i>detailing OR academic detailing OR educational outreach OR IEC OR BCC OR ' information, education and communication' OR 'behaviour change communication' OR 'behavior change communication' OR practice change OR call centre OR call center OR call-centre OR support OR pamphlet OR leaflet OR instruction OR education* OR advice OR guidance OR recommendation OR social marketing OR training OR train* intervention OR trial OR telemedicine OR telephone nursing, telenurs* OR telephone triage OR telehealth OR remote support OR remote technolog* OR mobile health OR telephone follow-up OR mhealth* OR telehealth OR eHealth<br/><br/>OR "Education"[Mesh] OR "Telemedicine"[Mesh] OR "Consumer Health Information"[Mesh] OR "Information Dissemination"[Mesh] ) OR "Social Marketing"[Mesh] OR "Controlled Before-After Studies"[Mesh] OR "Intervention Studies"[Mesh] (Pubmed/Embase databases only)</i> |

**Table 2 Individual item quality scores for methodological quality, objective 1**

0=not met 1= partially met 2=fully met

| Study                                                          | Item number ( key below) |   |   |   |   |   |   |   |     |     | Total | Overall <sup>1</sup> |
|----------------------------------------------------------------|--------------------------|---|---|---|---|---|---|---|-----|-----|-------|----------------------|
|                                                                | 1                        | 2 | 3 | 4 | 5 | 6 | 7 | 8 | 9   | 10  |       |                      |
| (Adinma & Adinma, 2013)                                        | 0                        | 0 | 0 | 1 | 2 | 1 | 0 | 1 | 1   | 1   | 7     | Low                  |
| (Akiode et al., 2010)                                          | 2                        | 1 | 2 | 1 | 2 | 1 | 1 | 0 | 1   | 1   | 12    | Medium               |
| (Billings, Walker, Mainero del Paso, Clark, & Dayananda, 2009) | 2                        | 2 | 2 | 2 | 2 | 2 | 2 | 2 | 2   | 2   | 20    | High                 |
| (Bonnema & Dalebout, 1992)                                     | 2                        | 2 | 0 | 2 | 1 | 2 | 1 | 1 | 1   | n/a | 12    | Medium               |
| (De Oddone, Shedlin, Welsh, Potts, & Feldblum, 1991)           | 1                        | 1 | 2 | 1 | 0 | 1 | 0 | 1 | 2   | 0   | 9     | Low                  |
| (Fetters et al., 2015)                                         | 0                        | 0 | 0 | 2 | 0 | 1 | 0 | 2 | 2   | 2   | 9     | Low                  |
| (Ganatra, Manning, & Pallipamulla, 2005)                       | 2                        | 2 | 2 | 1 | 2 | 2 | 1 | 0 | 1   | 1   | 14    | Medium               |
| (Hendrickson et al., 2015)                                     | 1                        | 0 | 0 | 1 | 0 | 2 | 2 | 2 | 1   | 2   | 11    | Medium               |
| (Huda, Ngo, Ahmed, Alam, & Reichenbach, 2014)                  | 1                        | 2 | 2 | 2 | 2 | 2 | 1 | 1 | 1   | 2   | 15    | Medium               |
| (Lara, Abuabara, Grossman, & Díaz-Olavarrieta, 2006)           | 2                        | 2 | 2 | 1 | 2 | 2 | 2 | 2 | 1   | 1   | 17    | High                 |
| (Lara, Garcia, Wilson, & Paz, 2011)                            | 2                        | 2 | 2 | 2 | 2 | 2 | 2 | 2 | 2   | 2   | 20    | High                 |
| (Miller et al., 2005)                                          | 1                        | 2 | 2 | 1 | 2 | 2 | 2 | 1 | 1   | 0   | 14    | Medium               |
| (Mishra, Yadav, Malik, Purwar, & Kumari, 2016)                 | 1                        | 1 | 0 | 1 | 2 | 1 | 1 | 2 | n/a | n/a | 9     | Medium               |
| (Ngo, Park, & Nguyen, 2012)                                    | 2                        | 2 | 2 | 1 | 2 | 2 | 0 | 1 | n/a | n/a | 12    | Medium               |
| (Powell-Jackson, Acharya, Filippi, & Ronsmans, 2015)           | 2                        | 2 | 2 | 2 | 2 | 2 | 2 | 2 | 2   | 2   | 20    | High                 |
| (Reiss, Aung, Aung, & Ngo, 2014)                               | 2                        | 1 | 2 | 1 | 2 | 2 | 2 | 2 | 1   | 2   | 16    | High                 |
| (Reiss et al., 2017)                                           | 2                        | 2 | 0 | 2 | 2 | 1 | 1 | 1 | n/a | 2   | 13    | Medium               |
| (Reiss, Keenan, et al., 2015)a                                 | 1                        | 1 | 2 | 2 | 2 | 1 | 2 | 2 | 1   | 2   | 16    | High                 |
| (Reiss, Footman, Akora, Liambila, & Ngo, 2016)                 | 2                        | 1 | 1 | 1 | 2 | 1 | 2 | 1 | 1   | 2   | 14    | Medium               |
| (Tamang & Tamang, 2005)                                        | 2                        | 2 | 1 | 2 | 1 | 2 | 2 | 1 | 1   | 2   | 16    | High                 |
| (Tamang, Puri, Lama, & Shrestha, 2015)                         | 1                        | 1 | 0 | 1 | 2 | 1 | 0 | 1 | 1   | 2   | 10    | Medium               |
| (Zamberlin, 2007)                                              | 0                        | 0 | 0 | 1 | 1 | 1 | 2 | 0 | n/a | n/a | 5     | Low                  |

<sup>1</sup> The quality level considered to be 'low' if score was <50%, medium if 50-75%, and high if >75%.**Key to items:**

1. Was the sample representative of the target population?
2. Were study participants recruited in an appropriate way?
3. Was the sample size adequate?

NB. (This was assessed by calculating the sample size requirements for estimating a single proportion, as suggested by (Munn, Moola et al. 2014), using the following formula:  $n = \frac{Z^2 P(1-P)}{d^2}$  where Z (Z statistic for level of confidence) was chosen as 1.96, P ( the expected prevalence ) was assumed to be 0.5, and d (precision) was chosen as 0.05. This yielded a minimum sample size of 384.

4. Were the study subjects and setting described in detail?
5. Is the data analysis conducted with sufficient coverage of the identified sample?
6. Were objective, standard criteria used for measurement of the condition?
7. Was the condition measured reliably?
8. Was there appropriate statistical analysis?
9. Are all important confounding factors/ subgroups/differences identified and accounted for?
10. Were subpopulations identified using objective criteria?

**Table 3 Individual item quality scores for intervention studies, objective 2**

0=not met 1= partially met 2=fully met

| Study                          | 1 | 2 | 3 | 4 | 5 | 6 | 7 | 8 | 9 | 10 | 11 | Total | Overall <sup>1</sup> |
|--------------------------------|---|---|---|---|---|---|---|---|---|----|----|-------|----------------------|
| (Fettters et al., 2015)        | 2 | 0 | 0 | 0 | 0 | 0 | 2 | 0 | 2 | 1  | 0  | 7     | Low                  |
| (Reiss, Keenan, et al., 2015a) | 2 | 0 | 0 | 0 | 2 | 0 | 2 | 1 | 1 | 2  | 0  | 10    | Low                  |
| (Tamang et al., 2015)          | 2 | 0 | 0 | 0 | 0 | 2 | 2 | 1 | 1 | 2  | 0  | 10    | Low                  |

<sup>1</sup> Study quality was graded with the following scores: 0–11, low quality; 12–17, medium quality; and 18–22, high quality.

| Items (adapted) used for quality assessment                                                              | Original CASP criteria                                                                      |
|----------------------------------------------------------------------------------------------------------|---------------------------------------------------------------------------------------------|
| 1. Did the study address a clearly focused issue?                                                        | 1. Did the trial address a clearly focused issue?                                           |
| 2. Were the intervention groups randomised? ( apply to pharmacies as well as individuals, if applicable) | 2. Was the assignment of patients to treatments randomised?                                 |
| 3. Were study participants and study personnel blinded?                                                  | 3. Were patients, health workers study personnel blinded?                                   |
| 4. Were the groups similar before the study and intervention?                                            | 4. Were the groups similar at the start of the trial?                                       |
| 5. Aside from the study intervention, were the groups treated equally?                                   | 5. Aside from the experimental intervention, were the groups treated equally?               |
| 6. Were all of the study participants properly accounted for at its conclusion?                          | 6. Were all of the patients who entered the trial properly accounted for at its conclusion? |
| 7. How large was the intervention effect?                                                                | 7. How large was the treatment effect?                                                      |
| 8. How precise was the estimate of the intervention effect?                                              | 8. How precise was the estimate of the treatment effect?                                    |
| 9. Can the results be applied in the local population?                                                   | 9. Can the results be applied in your context/the local population?                         |
| 10. Were all clinically important outcomes considered?                                                   | 10. Were all clinically important outcomes considered?                                      |
| 11. Have the costs or harms been assessed and weighed against the benefits?                              | 11. Are the benefits worth the harms and costs?                                             |

**Table 4 Summary of studies meeting inclusion criteria for objective 1**

| Study                                                                       | Year      | Setting                                                               | Abortion legality <sup>1</sup> | Study design (sample size) <sup>2</sup> | Sampling                                                                             | Outlet type                                                        | Population                                                                             | Outcomes measured                                                      | Methodological quality score <sup>2</sup> | Main methodological limitations                                                                                                      |
|-----------------------------------------------------------------------------|-----------|-----------------------------------------------------------------------|--------------------------------|-----------------------------------------|--------------------------------------------------------------------------------------|--------------------------------------------------------------------|----------------------------------------------------------------------------------------|------------------------------------------------------------------------|-------------------------------------------|--------------------------------------------------------------------------------------------------------------------------------------|
| (Adinma & Adinma, 2013) <sup>3</sup>                                        | 2009      | Nigeria (Anambra and Delta states)                                    | 2                              | PW survey (n=22)                        | Convenience                                                                          | Registered community pharmacies                                    | Pharmacists                                                                            | Scale of abortifacient provision, demand for abortifacients            | Low (7/20)                                | Non-representative sample, small sample size, outcomes self-reported                                                                 |
| (Akiode et al., 2010) <sup>3</sup>                                          | 2006      | Nigeria (Lagos and Abuja)                                             | 2                              | PW survey (n=591)                       | Census in Abuja. StRS+SRS+PPS in Lagos.                                              | Registered pharmacy shops and patent medicine stores               | Pharmacists, proprietors or vendors                                                    | Scale of abortifacient provision, demand for abortifacients            | Medium (12/20)                            | Sub-optimal recruitment, outcomes self-reported, inappropriate statistical analysis                                                  |
| (Billings, Walker, Mainero del Paso, Clark, & Dayananda, 2009) <sup>3</sup> | 2006      | Mexico (one unnamed state, rural and urban)                           | 2                              | MC survey (n=153)                       | StRS                                                                                 | Registered pharmacies, chain and independent                       | Pharmacy workers                                                                       | Scale of abortifacient provision, quality of provision                 | High (20/20)                              | None                                                                                                                                 |
| (Bonnema & Dalebout, 1992) <sup>3</sup>                                     | 1987      | Peru (Cusco)                                                          | 3                              | PW survey (n=26), MC survey (n=29)      | Census                                                                               | Pharmacies (not stated whether registered)                         | 'Salesman behind the counter'                                                          | Scale of abortifacient provision, knowledge and quality of provision   | Medium (12/18)                            | Sub-optimal statistical analysis, no confounding analysis, self-reported outcomes                                                    |
| (De Oddone, Shedlin, Welsh, Potts, & Feldblum, 1991) <sup>3</sup>           | 1985      | Paraguay (Asuncion)                                                   | 3                              | PW survey (n=80), FG                    | Convenience                                                                          | Registered pharmacies                                              | Pharmacists                                                                            | Demand for abortifacients                                              | Low (9/20)                                | Insufficient sample coverage, outcomes self-reported, sub-optimal statistical analysis                                               |
| (Fetters et al., 2015) <sup>3</sup>                                         | 2010-2012 | Zambia (Lusaka and Copperbelt province)                               | 4                              | PW survey (n=55) (baseline survey)      | Census                                                                               | Registered pharmacies with at least one registered pharmacy worker | Pharmacists and pharmacy technologists                                                 | Scale of abortifacient provision, knowledge, demand for abortifacients | Low (9/20)                                | Non-representative sample, inadequate recruitment technique, small sample size, insufficient sample coverage, outcomes self-reported |
| (Ganatra, Manning, & Pallipamulla, 2005) <sup>3</sup>                       | 2004      | India (2 state capitals and 10 district towns in Bihar and Jharkland) | 4                              | PW survey (n=209), IDIs (n=9)           | Two stage: SRS+ StRS (pharmacies that stocked and sold abortion drugs were selected) | Registered and unregistered chemists                               | Tried to interview 'main person', often had to interview person 'available at counter' | Scale of abortifacient provision, knowledge, demand for abortifacients | Medium (14/20)                            | Inadequate statistical analysis, outcomes self-reported                                                                              |

| Study                                                             | Year        | Setting                                        | Abortion legality <sup>1</sup> | Study design (sample size) <sup>2</sup> | Sampling                                                                                 | Outlet type                                                    | Population                                                    | Outcomes measured                                                                                                        | Methodological quality score <sup>2</sup> | Main methodological limitations                                                                                                                     |
|-------------------------------------------------------------------|-------------|------------------------------------------------|--------------------------------|-----------------------------------------|------------------------------------------------------------------------------------------|----------------------------------------------------------------|---------------------------------------------------------------|--------------------------------------------------------------------------------------------------------------------------|-------------------------------------------|-----------------------------------------------------------------------------------------------------------------------------------------------------|
| (Hendrickson et al., 2015) <sup>3</sup>                           | 2009 & 2011 | Zambia (3 provinces, urban and rural settings) | 4                              | MC survey (n=76 (2009), n=80 (2011))    | SRS                                                                                      | Government-certified pharmacies                                | Pharmacy workers                                              | Scale of abortifacient provision, quality of provision, demand for abortifacients                                        | Medium (11/20)                            | Small sample size, inadequate recruitment, insufficient sample coverage, potentially non-representative                                             |
| (Huda, Ngo, Ahmed, Alam, & Reichenbach, 2014) <sup>3</sup>        | 2011        | Bangladesh (Dhaka and Gazipur)                 | 2                              | MC survey (n=331)                       | Mapping + SRS                                                                            | Registered and unregistered premises clearly selling medicines | Pharmacy workers                                              | Scale of abortifacient provision, quality of provision                                                                   | Medium (15/20)                            | Potentially non-representative, outcomes self-reported, inadequate statistical analysis                                                             |
| (Lara, Abuabara, Grossman, & Díaz-Olavarrieta, 2006) <sup>3</sup> | 2004        | Latin American city                            | -                              | PW survey (n=97), MC survey (n=100)     | SRS                                                                                      | Registered pharmacies (63% independent, 37% chain)             | Vendor/cashiers (46%), owners (17%) and managers (31%)        | Scale of abortifacient provision, knowledge and quality of provision, demand for abortifacients                          | High (17/20)                              | Minimal description of setting and participants, not all important confounding factors, differences accounted for                                   |
| (Lara, Garcia, Wilson, & Paz, 2011) <sup>3</sup>                  | 2007        | Mexico (8 cities)                              | 2                              | MC survey (n=576)                       | StRS                                                                                     | Registered independent and chain pharmacies                    | Vendors (73%), managers (16%) and owners (11%)                | Scale of abortifacient provision, quality of provision                                                                   | High (20/20)                              | None                                                                                                                                                |
| (Miller et al., 2005) <sup>3</sup>                                | Nr          | Dominican Republic (Santa Domingo)             | 1                              | MC survey (n=80)                        | Convenience, selected based on their location in different socio-economic neighbourhoods | Pharmacies (not stated whether registered)                     | Sales person or pharmacy technician                           | Scale of abortifacient provision, quality of provision                                                                   | Medium (14/20)                            | Potentially non-representative, minimal description of setting and participants, inadequate statistical analysis, subgroups not defined objectively |
| (Mishra, Yadav, Malik, Purwar, & Kumari, 2016) <sup>3</sup>       | 2016        | India (urban areas of Delhi)                   | 4                              | Pharmacist/ PW survey (n=110)           | StRS of pharmacies within 6 districts                                                    | Nr                                                             | Pharmacists and pharmacy workers                              | Scale of abortifacient provision<br>Knowledge about legality of MA, drugs and regimen, side effects, provision practices | Medium (9/16)                             | Small sample size, inadequate recruitment, outcomes self-reported                                                                                   |
| (Ngo, Park, & Nguyen, 2012) <sup>3</sup>                          | 2010-11     | Vietnam (Ho Chi Minh city)                     | 5                              | PW survey (n=100), MC survey (n=30)     | SRS                                                                                      | Registered pharmacies                                          | Pharmacy workers responsible for provision of medicine with > | Scale of abortifacient provision, knowledge and quality of                                                               | Medium (12/16)                            | Minimal description of setting and participants, outcomes self-reported, inadequate statistical analysis                                            |

| Study                                                             | Year | Setting                                           | Abortion legality <sup>1</sup> | Study design (sample size) <sup>2</sup> | Sampling                                                                                            | Outlet type                                                  | Population                                                                                                                               | Outcomes measured                                                                                            | Methodological quality score <sup>2</sup> | Main methodological limitations                                                                                                      |
|-------------------------------------------------------------------|------|---------------------------------------------------|--------------------------------|-----------------------------------------|-----------------------------------------------------------------------------------------------------|--------------------------------------------------------------|------------------------------------------------------------------------------------------------------------------------------------------|--------------------------------------------------------------------------------------------------------------|-------------------------------------------|--------------------------------------------------------------------------------------------------------------------------------------|
| (Powell-Jackson, Acharya, Filippi, & Ronsmans, 2015) <sup>3</sup> | 2013 | India (Madhya Pradesh, rural and urban districts) | 4                              | PW survey (n=591), MC survey (n=359)    | StRS of districts + SRS PPS selection of sampling units + mapping + systematic sample of pharmacies | Registered and unregistered drug sellers                     | 6 months of work experience<br>'Person behind the counter'                                                                               | provision, demand for abortifacients<br>Scale of abortifacient provision, knowledge and quality of provision | High (20/20)                              | None                                                                                                                                 |
| (K Reiss, Aung, Aung, & Ngo, 2014) <sup>3</sup>                   | 2012 | South East Asian city                             | 2                              | PW survey (n=170), MC survey (n=193)    | Mapping of 4 purposively selected study areas + census                                              | Registered and unregistered pharmacies                       | Pharmacy workers who sold medications and worked at pharmacy >6 months. Most senior was invited for survey                               | Scale of abortifacient provision, knowledge and quality of provision, demand for abortifacients              | High (16/20)                              | Inadequate recruitment, minimal description of setting and participants, not all confounding factors and differences accounted for   |
| (Kate Reiss et al., 2017) <sup>3</sup>                            | 2013 | Senegal (Dakar)                                   | 1                              | PW survey (n=110)                       | SRS                                                                                                 | Registered pharmacies                                        | Pharmacy workers who sold medications and were over age 18. Owner or manager approached first, followed by next most senior staff member | Scale of abortifacient provision, knowledge, demand for abortifacients                                       | Medium (13/18)                            | Small sample size, insufficient sample coverage, outcomes self-reported                                                              |
| (K Reiss et al., 2015) <sup>4</sup>                               | 2013 | Bangladesh                                        | 2                              | PW survey (n=779)                       | SRS                                                                                                 | Registered pharmacies supplied by one pharmaceutical company | Pharmacy workers who sold medications and worked at pharmacy for >6 months. Longest-serving or owner interviewed                         | Scale of abortifacient provision, knowledge, demand for abortifacients                                       | High (16/20)                              | Non-representative sample, inadequate recruitment, outcomes self-reported, not all confounding factors and differences accounted for |
| (K Reiss, Footman, Akora, Liambila, & Ngo, 2016) <sup>3</sup>     | 2013 | Kenya (3 cities)                                  | 3                              | PW survey (n=235), MC survey (n=401)    | SRS                                                                                                 | Registered private pharmacies                                | Pharmacy workers who dispensed medicines and had worked at pharmacy for >6                                                               | Scale of abortifacient provision, knowledge and quality of provision, demand                                 | Medium (14/20)                            | Inadequate recruitment, small sample size (for survey), minimal description of setting and participants                              |

| Study                                               | Year | Setting                                               | Abortion legality <sup>1</sup> | Study design (sample size) <sup>2</sup> | Sampling         | Outlet type             | Population                                         | Outcomes measured                                                         | Methodological quality score <sup>2</sup> | Main methodological limitations                                                                                                             |
|-----------------------------------------------------|------|-------------------------------------------------------|--------------------------------|-----------------------------------------|------------------|-------------------------|----------------------------------------------------|---------------------------------------------------------------------------|-------------------------------------------|---------------------------------------------------------------------------------------------------------------------------------------------|
| (Tamang & Tamang, 2005) <sup>3</sup>                | Nr   | Nepal (urban and peri-urban areas across the country) | 5                              | PW survey (n=177)                       | Purposive + SRS  | Registered chemists     | Pharmacy workers                                   | Awareness of misoprostol and mifepristone (used as proxies for provision) | High (16/20)                              | Small sample size, insufficient sample coverage, inadequate statistical analysis, not all confounding factors and differences accounted for |
| (Tamang, Puri, Lama, & Shrestha, 2015) <sup>3</sup> | 2011 | Nepal (2 districts)                                   | 5                              | PW survey (n=414) (baseline survey)     | Cluster sampling | Registered pharmacies   | Main person responsible for looking after the shop | Scale of abortifacient provision, knowledge, demand for abortifacients    | Medium (10/20)                            | Non-representative sample, inadequate recruitment, outcomes self-reported                                                                   |
| (Zamberlin, 2007) <sup>5</sup>                      | Nr   | Argentina (Buenos Aires)                              | 3                              | MC survey (n=40)                        | Convenience      | 'Commercial pharmacies' | Pharmacists and pharmacy workers                   | Scale of abortifacient provision, quality of provision                    | Low (5/16)                                | Non-representative sample, inadequate recruitment, small sample size, inappropriate statistical analysis                                    |

Notes:

Key to acronyms: Nr= not reported PW= pharmacy worker/drug seller; MC= mystery client FG= Focus group; SRS= simple random sampling; StRS= stratified random sampling; PPS= probability proportional to size

<sup>1</sup> Key : 1: Prohibited completely 2: To save life of woman 3: To save life/preserve health of woman 4: To save woman's life, preserve physical and mental health, and on socioeconomic grounds 5: On request <sup>2</sup> Denominator may be less than 20 where items were non-applicable. <sup>3</sup> Peer-reviewed journal article. <sup>4</sup> Conference paper. <sup>5</sup> Published government report.



**Table 5 Extent of MA provision and provision practices of pharmacy workers and drug sellers: data extracted from 22 studies meeting inclusion criteria for objective 1**

| Study/ setting                                                                   | Study design               | Education/ qualifications of respondents                      | % respondents offering abortifacients | % respondents offering – mife-miso combination | % respondents offering misoprostol only                          | Other drugs sold for MA                                                                                                                                                                         | % respondents knew/ advised effective MA regimen |
|----------------------------------------------------------------------------------|----------------------------|---------------------------------------------------------------|---------------------------------------|------------------------------------------------|------------------------------------------------------------------|-------------------------------------------------------------------------------------------------------------------------------------------------------------------------------------------------|--------------------------------------------------|
| Studies of HIGH methodological quality                                           |                            |                                                               |                                       |                                                |                                                                  |                                                                                                                                                                                                 |                                                  |
| (Billings, Walker, Mainero del Paso, Clark, & Dayananda, 2009)/ <i>Mexico</i>    | MC (n=153)                 | Nr                                                            | 54% (spontaneously recommended)       | n/a                                            | 19% (spontaneous) (90% when prompted by client)                  | Metrigen (48%), other hormonal contraceptives, vitamin B, EC.                                                                                                                                   | 16% (misoprostol only regimen)                   |
| (Lara, Abuabara, Grossman, & Díaz-Olavarrieta, 2006)/ <i>Latin American city</i> | Survey (n=97), MC (n=100)  | 45% 10 yrs education; 29% received training on RH medications | 74% (MC) (recommended miso)           | 0% (survey and MC)                             | 60% (survey), 39% (MC) (recommended miso)                        | Hormonal injections (71% recommended to MCs), OC (19%), other (7%) including EC, oxytocin, quinine, gluconate, curettage. Miso and methotrexate (19%), hormonal injectables, oxytocin, EC (4%). | 6% (survey), 17% (MC) (misoprostol only regimen) |
| (Lara, Garcia, Wilson, & Paz, 2011)/ <i>Mexico</i>                               | MC (n=576)                 | Nr                                                            | 24% (spontaneously recommended)       | Nr                                             | 18% (spontaneously recommended) (78% overall including prompted) | Ayurvedic, homeopathic medicines (MC)                                                                                                                                                           | 3% (misoprostol only regimen)                    |
| (Powell-Jackson, Acharya, Filippi, & Ronsmans, 2015)/ <i>India</i>               | Survey (n=591), MC (n=359) | 96% higher education                                          | 32% (survey), 71% (MC)                | 31% (survey), 67% (MC)                         | 3% (survey), 4% (MC)                                             | Penorit (24%), OC and EC (1%), traditional medicines (14%) (MC)                                                                                                                                 | 68% (survey) 35% (MC) (mife-miso regimen)        |
| (K Reiss, Aung, Aung, & Ngo, 2014)/ <i>South East Asian city</i>                 | Survey (n=170), MC (n=193) | 67% had certificate or bachelors qualification in pharmacy    | 2% (survey), 49% (MC)                 | Nr                                             | 2% (survey), 9% (MC)                                             | OC, EC (28%)                                                                                                                                                                                    | 0% (MC) (miso regimen)                           |
| (K Reiss et al., 2015)a/ <i>Bangladesh</i>                                       | Survey (n=779)             | 26% higher education; 93% professional qualification          | 96%                                   | 27%                                            | 95%                                                              | Ayurvedic (21% aware), EP Forte, OC.                                                                                                                                                            | 23% (miso regimen)                               |
| (Tamang & Tamang, 2005)/ <i>Nepal</i>                                            | Survey (n=177)             | Nr                                                            | Nr                                    | Nr (aware 5%)                                  | Nr (aware 4%)                                                    |                                                                                                                                                                                                 | Nr                                               |
| Studies of MEDIUM methodological quality                                         |                            |                                                               |                                       |                                                |                                                                  |                                                                                                                                                                                                 |                                                  |
| (Akiode et al., 2010)/ <i>Nigeria</i>                                            | Survey (n=599)             | Nr                                                            | Nr                                    | Nr                                             | 3% (stock)                                                       | Nr                                                                                                                                                                                              | Nr                                               |
| (Bonnema & Dalebout, 1992)/ <i>Peru</i>                                          | Survey (n=26), MC (n=29)   | 50% pharmacist, 50% non-trained pharmacy assistant.           | 90% (MC)                              | Nr                                             | Nr                                                               | High-dose estrogen/ progestin (miso and mife not mentioned)                                                                                                                                     | N/A                                              |

|                                                                  |                               |                                                                                         |                                 |                            |                                                       |                                                                                                                 |                                      |
|------------------------------------------------------------------|-------------------------------|-----------------------------------------------------------------------------------------|---------------------------------|----------------------------|-------------------------------------------------------|-----------------------------------------------------------------------------------------------------------------|--------------------------------------|
| (Ganatra, Manning, & Pallipamulla, 2005)/ <i>India</i>           | Survey (n=209)                | Nr                                                                                      | Nr                              | 34%                        | 51%                                                   | Ayurvedic medicines (75%), EC (14%), OC (14%), prostaglandin injections (9%), other hormonal preparations (5%). | 16% (mife-miso regimen)              |
| (Hendrickson et al., 2015)/ <i>Zambia</i>                        | MC (n=76 (2009), n=80 (2011)) | Nr                                                                                      | 24% (2009); 48% (2011)          | 0% (2009 and 2011)         | 51% (2009); 72% (2011)                                | None                                                                                                            | 0% (2009); 21% (2011) (miso regimen) |
| (Huda, Ngo, Ahmed, Alam, & Reichenbach, 2014)/ <i>Bangladesh</i> | MC (n=331)                    | 'Limited training in general'                                                           | 76%                             | n/a                        | 39%                                                   | EC, herbal medicines, OC, hormonal preparations, combination of methylestrenolone and methylestradiol           | 7% (miso regimen)                    |
| (Miller et al., 2005)/ <i>Dominican Republic</i>                 | MC (n=80)                     | 'Generally ... a salesperson or pharmacy technician, and not the pharmacist'            | Nr                              | Nr                         | 64%                                                   | Nr                                                                                                              | Nr                                   |
| (Mishra, Yadav, Malik, Purwar, & Kumari, 2016) <i>India</i>      | Survey (n=110)                | 22% graduates, 68% have 'B.Pharm' (pharmacy qualification)                              | 22% sold over the counter drugs | Nr                         | Nr                                                    | Nr                                                                                                              | 41% (mife-miso)                      |
| (Ngo, Park, & Nguyen, 2012)/ <i>Vietnam</i>                      | Survey (n=100), MC (n=30)     | 89% with college education or higher                                                    | 30% (survey), 3% (MC)           | 4% (survey), 0% (MC)       | 17% (survey), 3% (MC)                                 | Mife alone                                                                                                      | Nr                                   |
| (K Reiss, Footman, Akora, Liambila, & Ngo, 2016) / <i>Kenya</i>  | Survey (n=235), MC (n=401)    | 95% trained to dispense medicines                                                       | 4% (survey), 42% (MC)           | 3% (MC)                    | 26% (MC)                                              | Surgical methods (27%) (MC)                                                                                     | 19% (survey) (miso regimen)          |
| (Kate Reiss et al., 2017)/ <i>Senegal</i>                        | Survey (110)                  | 82% with degree/professional training.                                                  | Nr                              | Nr                         | 25% sold misoprostol, but <1% sold misoprostol for MA | Nr                                                                                                              | 4% (misoregimen)                     |
| (Tamang, Puri, Lama, & Shrestha, 2015)/ <i>Nepal</i>             | Survey (n=414)                | 5% had pharmacy/medical training. Majority of pharmacy workers were mid-level providers | 42%                             | Do sell it, % not reported | Do sell it, % not reported                            | None                                                                                                            | 23% (unspecified drugs)              |

Studies of LOW methodological quality

|                                         |               |                            |    |    |                                          |                                                          |     |
|-----------------------------------------|---------------|----------------------------|----|----|------------------------------------------|----------------------------------------------------------|-----|
| (Adinma & Adinma, 2013)/ <i>Nigeria</i> | Survey (n=22) | 100% qualified pharmacists | Nr | Nr | 27% (currently stock for any indication) | Nr                                                       | Nr  |
| (De Oddone, Shedlin, Welsh, Potts, &    | Survey (n=80) | Nr                         | Nr | Nr | Nr                                       | High dose OC, progesterone injections (miso and mife not | N/A |

|                                          |               |                                                   |                                    |    |     |                                            |    |
|------------------------------------------|---------------|---------------------------------------------------|------------------------------------|----|-----|--------------------------------------------|----|
| Feldblum, 1991/<br><i>Paraguay</i>       |               | [Redacted]                                        |                                    |    |     | mentioned)                                 |    |
| (Fetters et al.,<br>2015)/ <i>Zambia</i> | Survey (n=53) | 55% pharmacists,<br>45% pharmacy<br>technologists | 21% mifepristone or<br>misoprostol | 7% | Nr  | EC, contraceptives or<br>uterotonics (30%) | Nr |
| (Zamberlin,<br>2007)/ <i>Argentina</i>   | MC (n=80)     | Nr                                                | 55%                                | Nr | 55% | Norgestrel Max,<br>Mistrogen Forte         | Nr |

Notes: Guide to acronyms: Nr= not reported, OC= oral contraceptives, EC= emergency contraceptives, Mife = mifepristone, Miso = misoprostol, N/A= not applicable (because product/service not available)

**Table 6 Intervention studies aimed at improving access to and knowledge of pharmacy/drug shop provision of MA: data extracted from 3 studies meeting inclusion criteria for objective 2**

| Study and setting                                                | Nature of intervention                                                                                                                                                                                           | Population (sample size)                                | Study design                                                                                        | Sampling and comparison group                                               | Outcome                                                                                                                                               | Analysis                          | Intervention findings                                                                                                                                            | Overall quality grade |
|------------------------------------------------------------------|------------------------------------------------------------------------------------------------------------------------------------------------------------------------------------------------------------------|---------------------------------------------------------|-----------------------------------------------------------------------------------------------------|-----------------------------------------------------------------------------|-------------------------------------------------------------------------------------------------------------------------------------------------------|-----------------------------------|------------------------------------------------------------------------------------------------------------------------------------------------------------------|-----------------------|
| <b>(Fetters et al., 2015)<sup>1</sup><br/>Zambia</b>             | 1 day training session for pharmacy workers on MA (misoprostol-only)                                                                                                                                             | Pharmacies with registered pharmacy workers (n=53)      | Cohort (baseline and post-intervention interview)                                                   | Selected all pharmacies within intervention area; no comparison group       | Attitudes, dispensing behaviours, harm reduction principles (including referrals, providing information))                                             | Descriptive statistics            | Increases in: referrals (47% to 68%*); providing information (55% to 75%*), selling misoprostol (9% to 32% sold to at least 1 client in past 3 months).          | Low (7/22)            |
| <b>(Reiss, Keenan, et al., 2015a)<sup>2</sup><br/>Bangladesh</b> | i) Face-to-face training sessions with NGO; ii) in-pharmacy detailing; iii) call centre for pharmacy workers and end-users on misoprostol for MR                                                                 | Pharmacy workers (n=714)                                | Post-intervention survey (retrospective reporting of intervention exposure)                         | SRS from list of pharmacies ; no comparison group                           | Knowledge of correct regimen for misoprostol-only among pharmacy workers who sold misoprostol in past 3 months                                        | Multivariable logistic regression | Regimen knowledge associated with: call centre use (aOR 1.95,95%CI 1.08-3.13); receipt of NGO training (aOR 2.03, 95%CI 1.08-3.80.                               | Low (10/22)           |
| <b>(Tamang et al., 2015)<sup>1</sup><br/>Nepal</b>               | 2 day training course and 1 day refresher course 10 months later. Printed materials and referral vouchers. Interactive meeting between pharmacy workers and qualified abortion providers to encourage referrals. | Pharmacy workers (n=414- 202 intervention, 212 control) | Controlled pre-/post-test, using independent baseline and post-intervention cross-sectional surveys | Mapping and cluster sampling, comparison group in different geographic area | Knowledge of: upper gestational limit; correct regimen; route of administration; assessment of completeness of abortion; symptoms requiring referral. | Descriptive statistics            | Improvement in: knowledge of regimen (22% to 88% intervention, 23% to 41% control); identifying complete abortion (65% to 77% intervention, 51% to 49% control). | Low (10/22)           |

Notes: Guide to acronyms: OC= oral contraceptives, EC= emergency contraceptives, SRS =simple random sampling, IEC=Information and educational materials, FP=family planning, STIs=sexually transmitted infections, NGO=non-governmental organisation, MC=mystery client, OR= odds ratio, CI= confidence intervals, MA=medical abortion <sup>1</sup> Published peer-reviewed journal article. <sup>2</sup> Conference paper. \* P<0.05
